# Supplementary material
Source: PubMed Central journal article supplement (PMC2689805)
Supplement: en.2008-1622_1.pdf [file en.2008-1622_1.pdf]

**Table 1**

Body weight, blood glucose, and lipids of ND and HFD mice

|                               | ND       | HFD        |
|-------------------------------|----------|------------|
| Weight (g)                    | 26 ± 0.5 | 36 ± 1.5 * |
| Fasting Blood Glucose (mg/dL) | 91 ± 6   | 143 ± 7 ** |
| Total Cholesterol (mg/dL)     | 67 ± 6   | 98 ± 2 *   |
| Triglycerides (mg/dL)         | 53 ± 7   | 63 ± 6     |

*All measurements were taken after 12 weeks on either a 10% (ND) or 60% (HFD) fat diet. Results are expressed as mean ± SEM, n=6-8/phenotype (\*p=0.002, \*\*p=0.0005, ND vs HFD).*

**Table 2**

Basal Serum Cytokines of ND and HFD mice

|                       | ND                   | HFD                    |
|-----------------------|----------------------|------------------------|
| IL-1 $\beta$ (pg/mL)  | 72.05 $\pm$ 9.71     | 58.76 $\pm$ 10.29      |
| IL-6 (pg/mL)          | 97.26 $\pm$ 8.81     | 50.98 $\pm$ 12.24*     |
| TNF- $\alpha$ (pg/mL) | 285.30 $\pm$ 46.69   | 241.21 $\pm$ 28.68     |
| IL-12 (p40) (pg/mL)   | 148.56 $\pm$ 11.65   | 125.39 $\pm$ 7.99      |
| IL-12 (p70) (pg/mL)   | 80.82 $\pm$ 5.56     | 63.16 $\pm$ 10.68      |
| INF- $\gamma$ (pg/mL) | 30.14 $\pm$ 7.74     | 24.01 $\pm$ 4.10       |
| IL-1RA (pg/mL)        | 10.4 $\pm$ 7.3       | 112.65 $\pm$ 38.01**   |
| IL-4 (pg/mL)          | 13.05 $\pm$ 0.84     | 9.96 $\pm$ 1.80        |
| IL-10 (pg/mL)         | 158.71 $\pm$ 9.17    | 122.37 $\pm$ 21.47     |
| IL-13 (pg/mL)         | 201.85 $\pm$ 57.38   | 166.18 $\pm$ 23.64     |
| Leptin (pg/mL)        | 5214.83 $\pm$ 543.10 | 7215.35 $\pm$ 69.61*** |

All measurements were taken after 12 weeks on either a 10% (ND) or 60% (HFD) fat diet. Results are expressed as mean  $\pm$  SEM, n=4-5/phenotype (\*p<0.05, \*\*p<0.005, \*\*\*p<0.00005 ND vs HFD).

**Table 3**

Basal White Adipose Tissue Cytokines of ND and HFD mice

|                                                          | ND              | HFD                  |
|----------------------------------------------------------|-----------------|----------------------|
| <b>IL-1RA (<math>\Delta</math>mRNA)</b>                  |                 |                      |
| Perigonadal                                              | 1.07 $\pm$ 0.37 | 41.43 $\pm$ 7.78**   |
| Subcutaneous                                             | 1.78 $\pm$ 0.64 | 4.12 $\pm$ 0.71      |
| Perirenal                                                | 1.50 $\pm$ 0.93 | 142.30 $\pm$ 39.56*  |
| Mesenteric                                               | 1.46 $\pm$ 0.6  | 1.03 $\pm$ 0.27      |
| <b>IL-1R2 (<math>\Delta</math>mRNA)</b>                  |                 |                      |
| Perigonadal                                              | 1.03 $\pm$ 0.20 | 2.88 $\pm$ 0.36#     |
| Subcutaneous                                             | 0.80 $\pm$ 0.37 | 0.39 $\pm$ 0.18      |
| Perirenal                                                | 0.45 $\pm$ 0.17 | 4.78 $\pm$ 1.31*     |
| Mesenteric                                               | 1.08 $\pm$ 0.22 | 0.83 $\pm$ 0.17      |
| <b>IL-1<math>\alpha</math> (<math>\Delta</math>mRNA)</b> |                 |                      |
| Perigonadal                                              | 0.97 $\pm$ 0.09 | 1.08 $\pm$ 0.39      |
| Subcutaneous                                             | 1.15 $\pm$ 0.51 | 0.25 $\pm$ 0.08      |
| Perirenal                                                | 1.67 $\pm$ 0.71 | 22.23 $\pm$ 7.02#    |
| Mesenteric                                               | 1.09 $\pm$ 0.55 | 189.13 $\pm$ 53.72#  |
| <b>IL-1<math>\beta</math> (<math>\Delta</math>mRNA)</b>  |                 |                      |
| Perigonadal                                              | 1.03 $\pm$ 0.76 | 1.76 $\pm$ 0.78      |
| Subcutaneous                                             | 1.19 $\pm$ 0.41 | 0.24 $\pm$ 0.09      |
| Perirenal                                                | 1.81 $\pm$ 0.65 | 3.64 $\pm$ 0.9       |
| Mesenteric                                               | 1.16 $\pm$ 0.57 | 133.42 $\pm$ 22.38## |

All measurements were taken after 12 weeks on either a 10% (ND) or 60% (HFD) fat diet. Results are expressed as relative change in target mRNA to GAPDH ( $\Delta$ mRNA) and as mean  $\pm$  SEM, n=6-8/phenotype (\*p=0.01, \*\*p=0.002, #p=0.004, ###p=0.0004 ND vs HFD).
